# Supplementary material for: Safety and Clinical Outcome of Thrombolysis in Ischaemic Stroke Using a Perfusion CT Mismatch between 3 and 6 Hours
Source: PubMed Central journal article supplement (PMC3189921; doi:10.1371/journal.pone.0025796), 2011-10-10

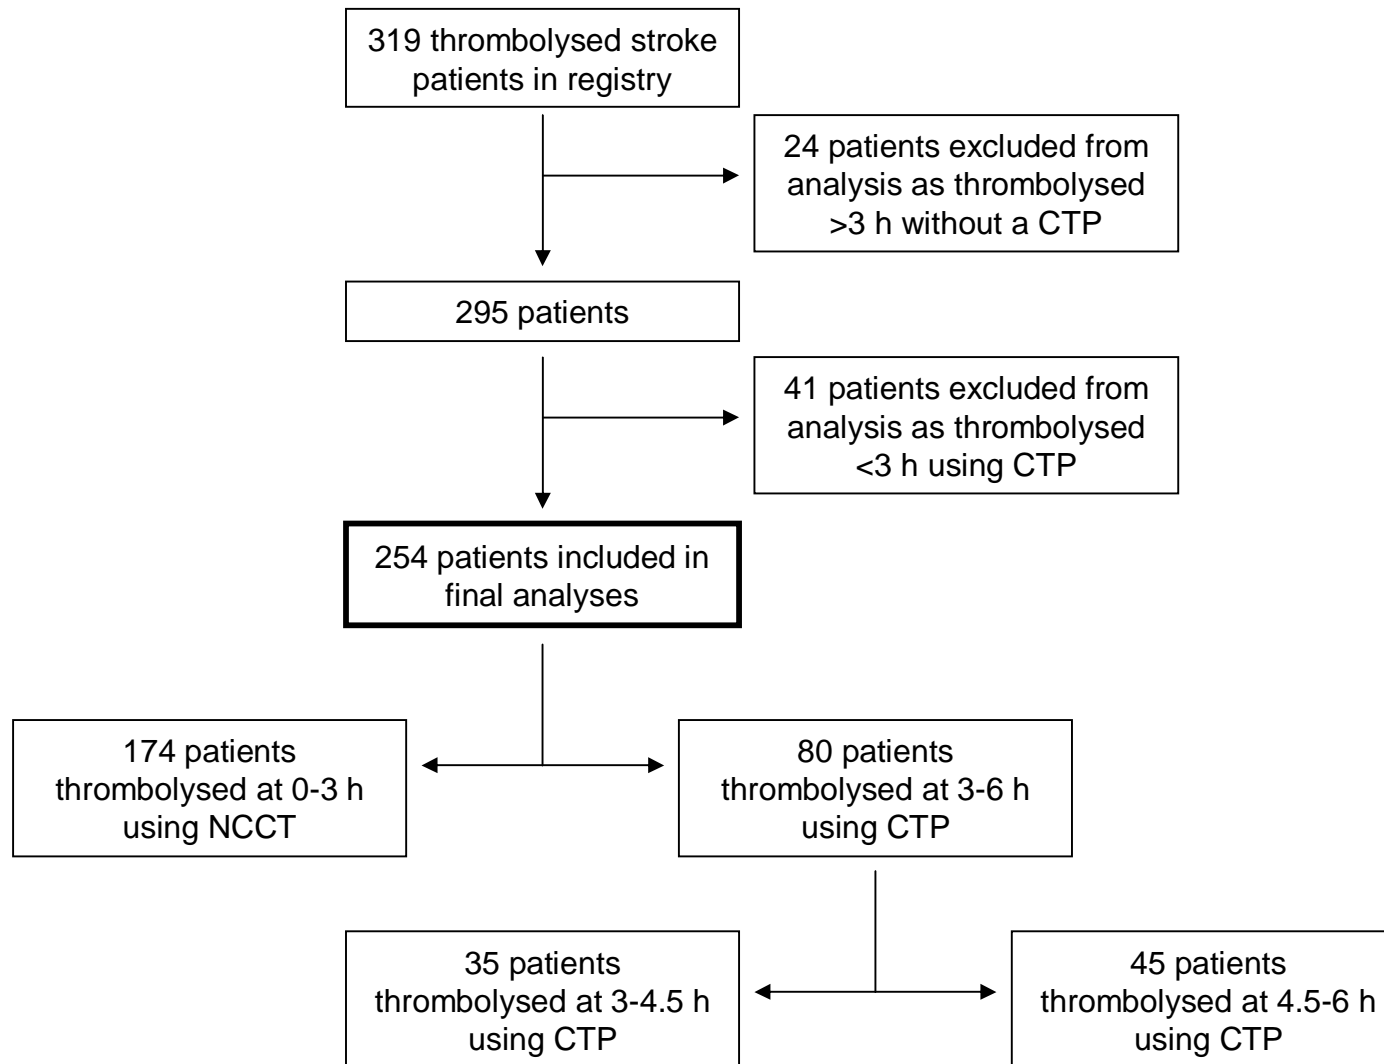

Supplement: pone.0025796.s001.pdf [file pone.0025796.s001.pdf]
